1 **Integration of locomotion and auditory signals in the mouse inferior colliculus**

2

3 Yoonsun Yang<sup>1,2</sup>, Joonyeol Lee<sup>2,3</sup>, and Gunsoo Kim<sup>2,\*</sup>

4

5 <sup>1</sup>Department of Physiology, Sungkyunkwan University School of Medicine, Suwon 16419,

6 Korea

7 <sup>2</sup>Center for Neuroscience Imaging Research (CNIR), Institute for Basic Science (IBS),

8 Suwon 16419, Korea

9 <sup>3</sup>Department of Biomedical Engineering, Sungkyunkwan University, Suwon 16419, Korea

10

11 \*Corresponding author: [kgunsoo@skku.edu](mailto:kgunsoo@skku.edu)

12

13

14

15

16

17

18

19 **Abstract**

20

21 The inferior colliculus (IC) is the major midbrain auditory integration center, where virtually all  
22 ascending auditory inputs converge. Although the IC has been extensively studied for sound  
23 processing, little is known about the neural activity of the IC in moving subjects, as  
24 frequently happens in natural hearing conditions. Here we show, by recording the IC neural  
25 activity in walking mice, the activity of IC neurons is strongly modulated by locomotion in the  
26 absence of sound stimulus presentation. Similar modulation was also found in deafened  
27 mice, demonstrating that IC neurons receive non-auditory, locomotion-related neural signals.  
28 Sound-evoked activity was attenuated during locomotion, and the attenuation increased  
29 frequency selectivity across the population, while maintaining preferred frequencies. Our  
30 results suggest that during behavior, integrating movement-related and auditory information  
31 is an essential aspect of sound processing in the IC.

32

33

34

35

36

37

38

39

40

## 41 **Introduction**

42

43 The inferior colliculus (IC) is the major auditory integration center in the midbrain, where  
44 virtually all ascending inputs from the auditory brainstem and the descending cortical inputs  
45 converge (Adams, 1979, 1980; Malmierca, 2004; Winer and Schreiner, 2005). The IC plays  
46 a critical role in auditory processing, such as representing spectrotemporal features and  
47 communication sounds (Egorova et al., 2001; Escabi and Schreiner, 2002; Lesica and  
48 Grothe, 2008; Woolley and Portfors, 2013), and sound localization (Bock and Webster, 1974;  
49 Schnupp and King, 1997; Lesica et al., 2010; Xiong et al., 2013; Ono and Oliver, 2014).  
50 While auditory response properties have been extensively studied, most of neural recordings  
51 in the IC have been performed in stationary subjects, and little is known about the IC activity  
52 while subjects are engaged in locomotion.

53

54 The central nucleus of the IC is considered a predominantly auditory structure. In contrast,  
55 the shell region of the IC (the lateral and dorsal cortex) receives non-auditory inputs such as  
56 somatosensory inputs (Cooper and Young, 1976; Morest and Oliver, 1984; Coleman and  
57 Clerici, 1987; Lesicko et al., 2016) and is thought to perform multi-sensory integration (Aitkin  
58 et al., 1978, 1981; Jain and Shore, 2016). The shell region has also been implicated in  
59 generating sound-driven behavior by projecting to motor-related regions (Huffman and  
60 Henson, 1990; Xiong et al., 2015). Although this multi-modal integration may subserve a  
61 range of functions (Gruters and Groh, 2012), modulation of the IC activity during vocalization  
62 (Schuller, 1979; Tammer et al., 2004; ) or eye movements (Groh et al., 2001; Porter et al.,  
63 2006, 2007) suggests that a main role of the non-auditory inputs is providing motor-related  
64 information.

65

66 Movement adds challenges to auditory processing such as recognizing sounds associated  
67 with movement itself or changing spatial relationships with a sound source. In order to

68 accurately detect and localize sounds during movement, it is hypothesized that the auditory  
69 system distinguishes self-generated sounds from external ones (Poulet and Hedwig, 2002;  
70 Rummell et al., 2016; Schneider et al., 2018) and integrates movement-related signals with  
71 auditory information. Recent studies in behaving mice show that movements such as  
72 locomotion indeed strongly modulate neural activity in the mouse primary auditory cortex  
73 (A1) (Schneider et al., 2014; Zhou et al., 2014; McGinley et al., 2015; Bigelow et al., 2019).  
74 Although it has been shown that neurons in A1 receive movement-related signals from  
75 sources outside the auditory pathway (Schneider et al., 2014; Nelson et al., 2013; Nelson  
76 and Mooney, 2016; Reimer et al., 2016), movement-related modulation is also found in  
77 subcortical auditory centers. In the medial geniculate body (MGB) of the thalamus, for  
78 instance, sound-evoked activity is attenuated during locomotion (Williamson et al., 2015;  
79 Schneider et al., 2014). There is also evidence for motor-related modulation in the auditory  
80 brainstem structures during vocalization, licking, and pinna orientation (Suga and Schlegel,  
81 1972; Schuller, 1979; Kanold and Young, 2001; Singla et al., 2017). Evidence of these  
82 subcortical modulations suggests that the loci of the integration of movement-related and  
83 auditory information are spread out along the auditory pathway, including the IC.

84

85 To determine whether and how the neural activity of the IC is modulated during movement,  
86 we investigated neural activity of the mouse IC during locomotion. Using an awake head-  
87 fixed mouse preparation, we compared the IC neural activity between stationary and walking  
88 conditions. Our results demonstrate both spontaneous and sound-evoked activity of IC  
89 neurons are strongly modulated during locomotion. Adding to the growing body of evidence  
90 of movement-related modulation in the auditory pathway, our results indicate that auditory  
91 midbrain neurons receive information about body movement, which may be important for  
92 auditory processing during movement and acoustically guided behavior.

93

94

95 **Results**

96

97 **Spontaneous neural activity of IC neurons is modulated during locomotion**

98 We made extracellular recordings of spiking neural activity of IC neurons in awake head-  
99 fixed mice, placed on a passive treadmill. This preparation enabled us to observe the IC  
100 neural activity during locomotion. When we compared firing rates between stationary and  
101 walking periods, we found that, in the absence of sound stimulus presentation, the firing  
102 rates of IC neurons could be strongly modulated during locomotion. Some neurons showed  
103 a robust increase in firing during the bouts of locomotion (Figure 1A), while others showed a  
104 decrease in firing (Figure 1B). Of 96 recorded IC neurons, 51 neurons (53%) significantly  
105 increased their firing during locomotion, while 22 neurons (23%) decreased their firing  
106 (Figure 1C). In 23 neurons (24%), firing rates did not significantly differ between the  
107 stationary and walking periods. Neurons that increased firing showed positive correlation  
108 between the firing rate and the walking speed, whereas neurons that decreased firing  
109 showed negative correlation (Figure 1D).

110

111 The subdivisions of the IC – central nucleus, lateral cortex, and dorsal cortex - differ in  
112 cytoarchitecture and projection patterns (Morest and Oliver, 1984). For example, the lateral  
113 cortex is known to receive somatosensory inputs (Lesicko et al., 2016). To determine  
114 whether neurons that showed robust locomotion-related modulation are clustered, we  
115 examined the locations of recording sites based on lesions. Anatomical reconstruction of the  
116 recording locations did not show any clustering in terms of modulation or the direction of  
117 modulation (Figure 1E). Instead, all three types of neurons – increase (red), decrease (blue),  
118 or no change (black) - were found across the IC with no clear pattern.

119

120 **Neural modulation precedes locomotion onset**

121 When mice walk on a treadmill, the movements generate low intensity sounds. Therefore,

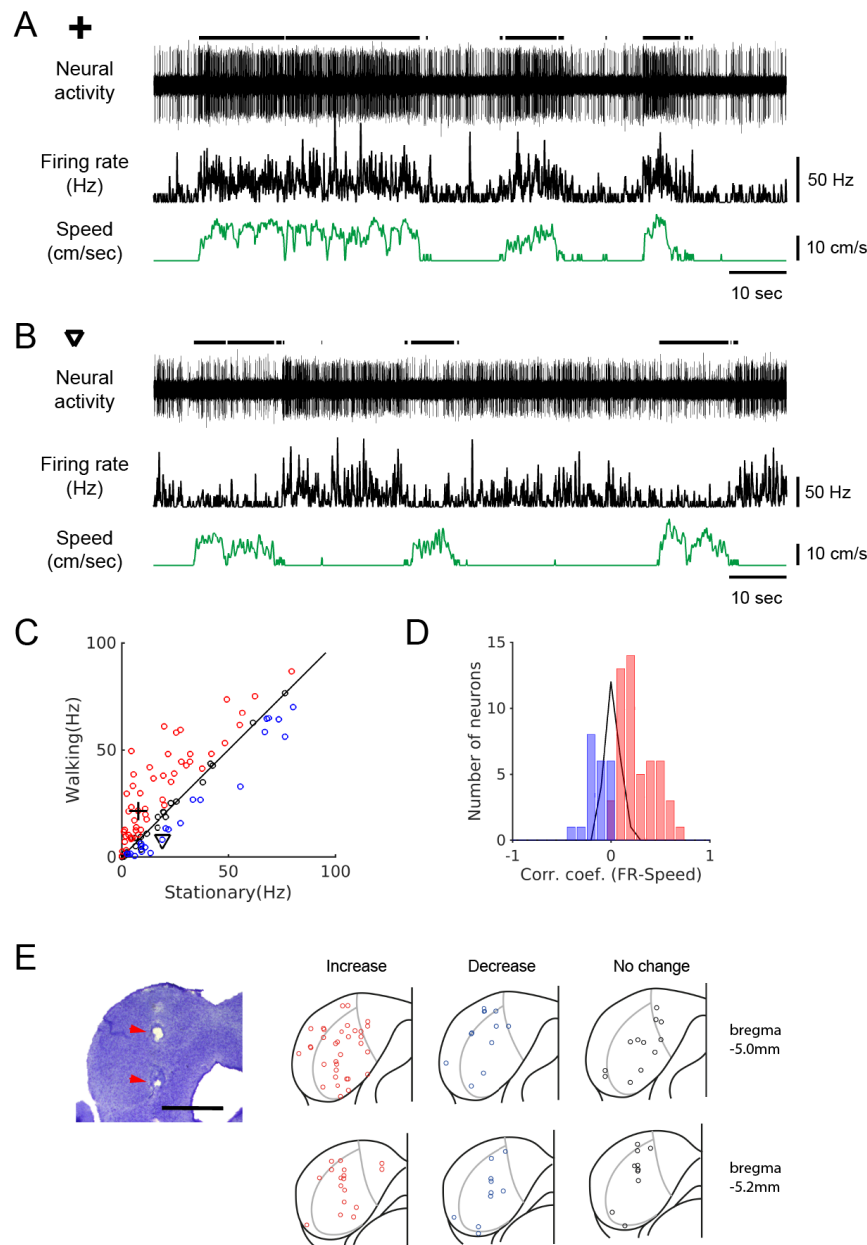

**Figure 1.** Spontaneous activity of IC neurons is modulated by locomotion. **(A-B)** Example recordings of spontaneous activity in IC neurons. In the neuron in A, the average spontaneous firing rate increased during walking periods (from 7.6 Hz to 21.6 Hz), whereas in the neuron in B, the firing rate decreased during walking periods (from 19.1 Hz to 8.2 Hz). In both cases, the smoothed firing rates (black middle traces) exhibit significant correlations with the speed of the treadmill (green bottom traces) (A:  $r = 0.59$ ; B:  $r = -0.24$ ). Thick black lines above the neural records indicate walking periods. **(C)** Population plot comparing average spontaneous firing rates between stationary and walking conditions ( $n = 96$  neurons). Red circles: increase, blue: decrease, black: no significant change in firing. Values for the example neurons in A (cross) and B (triangle) are also shown. **(D)** Histogram of correlation coefficients between smoothed firing rate and speed (color code as in C). **(E)** Photomicrograph of a Nissl section with lesion sites marked with red arrow heads (scale bar = 1 mm), and reconstructed recording locations are shown in 2 transverse sections (5.0 mm and 5.2 mm posterior to the bregma, respectively). Color code as in C.

122

123

124

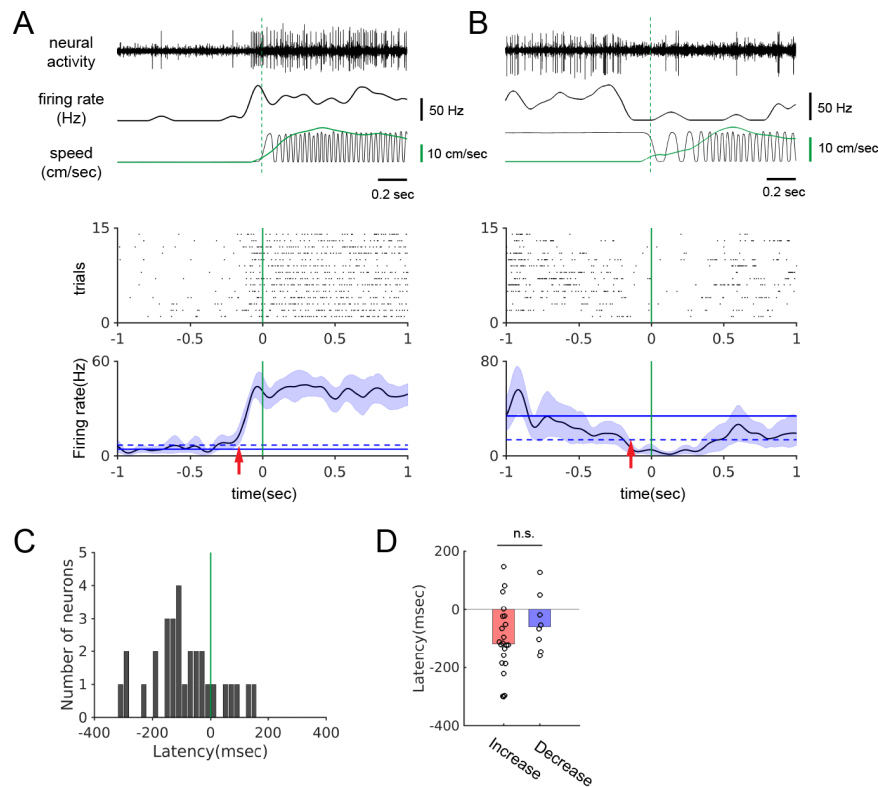

**Figure 2.** The onset of firing rate modulation precedes locomotion onset. **(A-B)** Top: Example neural records, corresponding smoothed firing rates, and locomotion signals (black: treadmill sensor output, green: speed). Bottom: Spike rasters aligned at the onset of walking and the locomotion onset-triggered averages of firing rates. Blue shades indicate the 95% confidence interval of the average firing rates. Horizontal solid and dashed lines show the average spontaneous firing rate and the two times the standard deviation above (A) or below (B) the average, respectively. Vertical green lines indicate locomotion onset. Red arrows indicate modulation onset. **(C)** Histogram of the neural modulation latencies relative to locomotion onset ( $n = 30$ ). Time zero indicates locomotion onset. **(D)** Modulation latencies for neurons with increased (red bar,  $n = 22$ ) and decreased (blue bar,  $n = 8$ ) firing during locomotion (Wilcoxon rank sum test,  $p = 0.25$ ). Bar graphs show the median latencies.

125 the observed locomotion-related modulation in IC neurons could have resulted from auditory  
 126 responses to the sounds generated by walking. If the firing rate change starts before  
 127 locomotion onset, however, it would indicate the modulation is not simply due to auditory  
 128 reafference (Schneider et al., 2014). To determine the timing of modulation with respect to  
 129 locomotion, we performed locomotion onset-triggered averaging of firing rates across  
 130 walking bouts of a neuron. In the example neuron shown in Figure 2A, the firing rate begins  
 131 to increase well before the onset of locomotion. In a different neuron (Figure 2B), a  
 132 suppression of neural firing occurs before the onset of locomotion. In most of the 30 neurons

133 that yielded significant onset-triggered averages (see Methods), the onset of the firing rate  
134 modulation preceded locomotion onset (Figure 2C,  $n = 30$ , median latency = -107 msec).  
135 These negative latencies were observed regardless of the direction of the modulation  
136 (Figure 2D; positive modulation: red bar,  $n = 22$ , -118 msec; negative modulation: blue bar,  $n$   
137 = 8, -60 msec; Wilcoxon rank sum test,  $p = 0.25$ ). This demonstrates that neural modulation  
138 can begin before any detectable movement, which therefore is not simply attributable to  
139 auditory responses to walking sounds.

140

#### 141 **Walking sound playback does not mimic neural modulation by locomotion**

142 To directly investigate the contribution of auditory reafference, we examined neural  
143 responses to the playback of the recorded walking sounds ( $n = 25$ ). In our behavioral  
144 apparatus, the walking sounds had the sound pressure level of approximately 30 dB or less  
145 (see Methods) with sound energy mainly around 4 to 20 kHz (Figure 3A). About ~52% of the  
146 recorded neurons did show a significant average firing rate increase during passive playback  
147 of the walking sounds (Figure 3B). Across the population, however, the range of the  
148 playback-evoked firing rate changes was significantly smaller than that of the changes  
149 during locomotion (Figure 3C;  $F$  test,  $p = 2.7 \times 10^{-5}$ ).

150

151 In 19 of the 25 neurons (76%) that showed significant modulation during locomotion (13  
152 increased; 6 decreased), the firing rate changes during locomotion and playback were  
153 compared. As shown in the example neurons (Figure 3D-E), the firing rate change during  
154 locomotion was not well mimicked by playback. In neurons that increased firing during  
155 locomotion, the overall playback-induced firing rate increase was not significantly different  
156 from the increase by locomotion (Figure 3F, left,  $n = 13$ ;  $W$ :  $10.6 \pm 2.0$  Hz;  $P$ :  $5.3 \pm 1.6$  Hz,  
157 Wilcoxon signed rank test,  $p = 0.057$ ). However, most neurons showed significantly smaller  
158 firing rate increase by playback, accounting for ~37% of the modulation by locomotion ( $n =$   
159 11/13, Wilcoxon signed rank test,  $p = 0.00098$ ; Figure 3D and 3F, middle). In the remaining



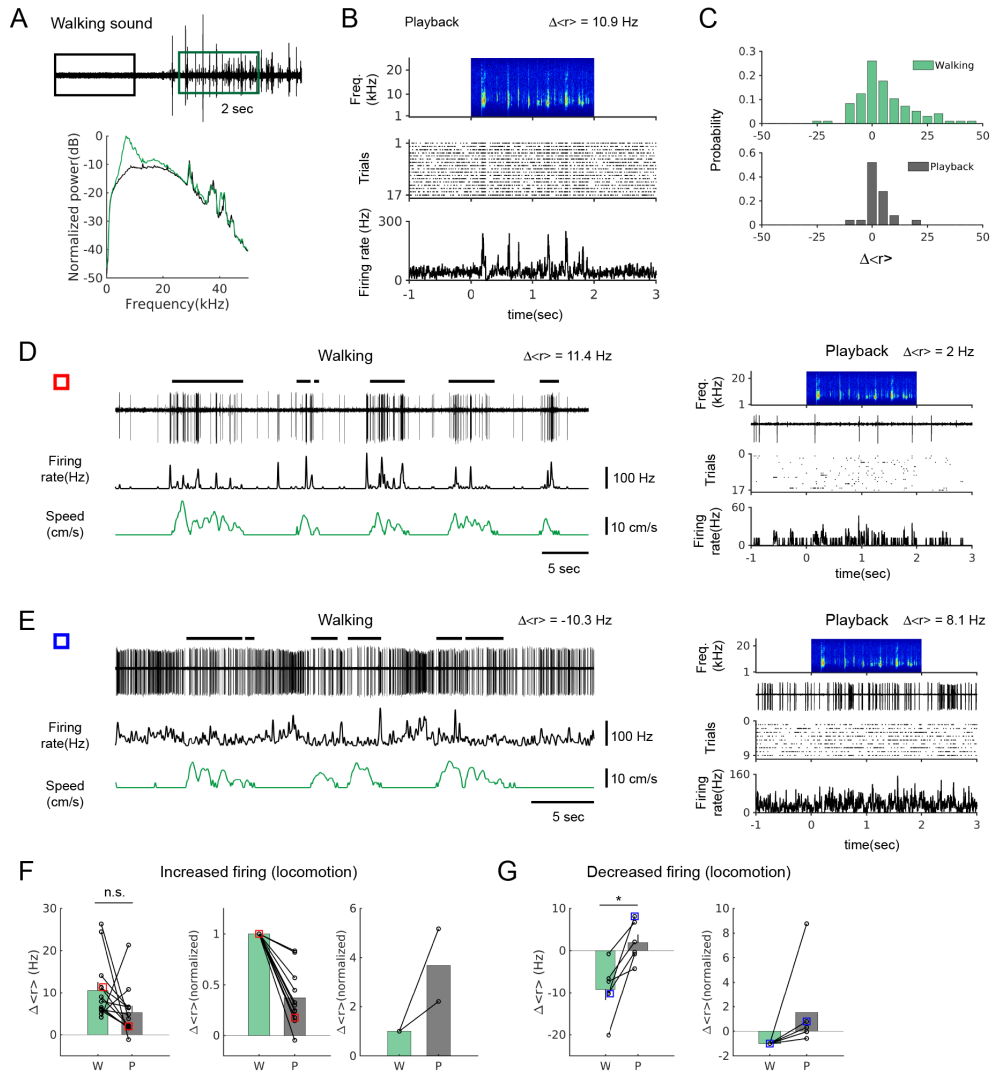

**Figure 3.** Walking sound playback does not mimic neural modulation by locomotion. **(A)** Top: walking sound recording in sound pressure waveforms (Black and green boxes denote 2 second periods during baseline and walking, respectively, used for power spectrum calculation). Bottom: normalized power spectrum (black trace: baseline, green trace: walking). **(B)** Example neuron that showed a relatively strong response to the playback of walking sounds ( $\Delta\langle r \rangle = 10.9$  Hz). Spectrogram of walking sounds (top), raster plot (middle), and PSTH (bottom) are shown. **(C)** Distributions of average firing rate changes by locomotion (top,  $n = 96$ ) and by playback (bottom,  $n = 25$ ).  $F$  test,  $p = 2.7 \times 10^{-5}$ . **(D)** Example neuron that showed a strong positive modulation during locomotion (left;  $\Delta\langle r \rangle = 11.4$  Hz), but a weak response to the playback (right;  $\Delta\langle r \rangle = 2.0$  Hz). **(E)** Example neuron that showed a suppression during locomotion (left;  $\Delta\langle r \rangle = -10.3$  Hz), but an excitatory response to the playback (right,  $\Delta\langle r \rangle = 8.1$  Hz). **(F)** Comparison of average firing rate changes ( $\Delta\langle r \rangle$ ) during locomotion (green bars) and playback (gray bars) in neurons that increased firing during locomotion ( $n = 13$ ). Left:  $\Delta\langle r \rangle$  comparison (W: walking, P: playback; Wilcoxon signed rank test,  $p = 0.057$ ), Center:  $\Delta\langle r \rangle$  normalized to locomotion values ( $n = 11/13$ ), Right:  $\Delta\langle r \rangle$  normalized to locomotion values in neurons with playback response much greater than modulation by locomotion ( $n = 2/13$ ). Red squares represent the neuron shown in D. **(G)** Same as F, but neurons that decreased firing during locomotion ( $n = 6$ ). Left:  $\Delta\langle r \rangle$  comparison (Wilcoxon signed rank test,  $p = 0.0082$ ), Right:  $\Delta\langle r \rangle$  normalized to locomotion values. Blue squares represent the neuron in E.

160 two neurons, the playback-induced firing rate increase was much greater than the increase  
161 by locomotion (Figure 3F, right;  $n = 2/13$ , 220% and 517%, respectively). Therefore, in this  
162 group, the playback response was either much smaller or larger than the modulation by  
163 locomotion.

164

165 In neurons that decreased firing during locomotion, the firing rate did not similarly decrease  
166 during playback (Figure 3E and 3G;  $n = 6$ ,  $W: -9.2 \pm 2.6$  Hz;  $P: 1.9 \pm 1.9$  Hz, Wilcoxon  
167 signed rank test,  $p = 0.0082$ ). Therefore, in these neurons as well, playback response did  
168 not mimic the modulation by locomotion. Taken together, our playback results indicate that  
169 although the walking sounds may evoke auditory responses during locomotion, this auditory  
170 reafference cannot account for most of the observed firing rate modulation during  
171 locomotion.

172

### 173 **Locomotion modulates spontaneous activity in deafened mice**

174 To further substantiate that non-auditory neural signals modulate the IC activity during  
175 locomotion, we bilaterally deafened mice by removing the middle ear ossicles and applying  
176 an ototoxin (kanamycin) to the cochlea (see Methods;  $n = 4$  mice). The effect of deafening  
177 was examined by systematically recording multi-unit responses to broadband noise across  
178 the IC. In normal mice, multi-unit responses are evident typically around 30 dB (Figure 4A,  
179 left and 4B, top). In deafened mice, however, the responses only appeared at 70 dB or  
180 higher (Figure 4A, right and 4B, bottom), indicating that the procedure raised hearing  
181 thresholds by at least 40 dB. We reasoned that in these mice, it would be highly unlikely that  
182 the low intensity walking sounds ( $< 30$  dB, Figure 3) evoke neural responses. As shown in  
183 an example neuron from a deafened mouse (Figure 4C), we observed a robust increase in  
184 firing during locomotion, while the same neuron did not show any discernible response to  
185 broadband sound stimuli (Figure 4D). We observed both increases and decreases in neural  
186 firing during locomotion in deafened mice, as was the case in normal hearing mice ( $n = 34$ ;

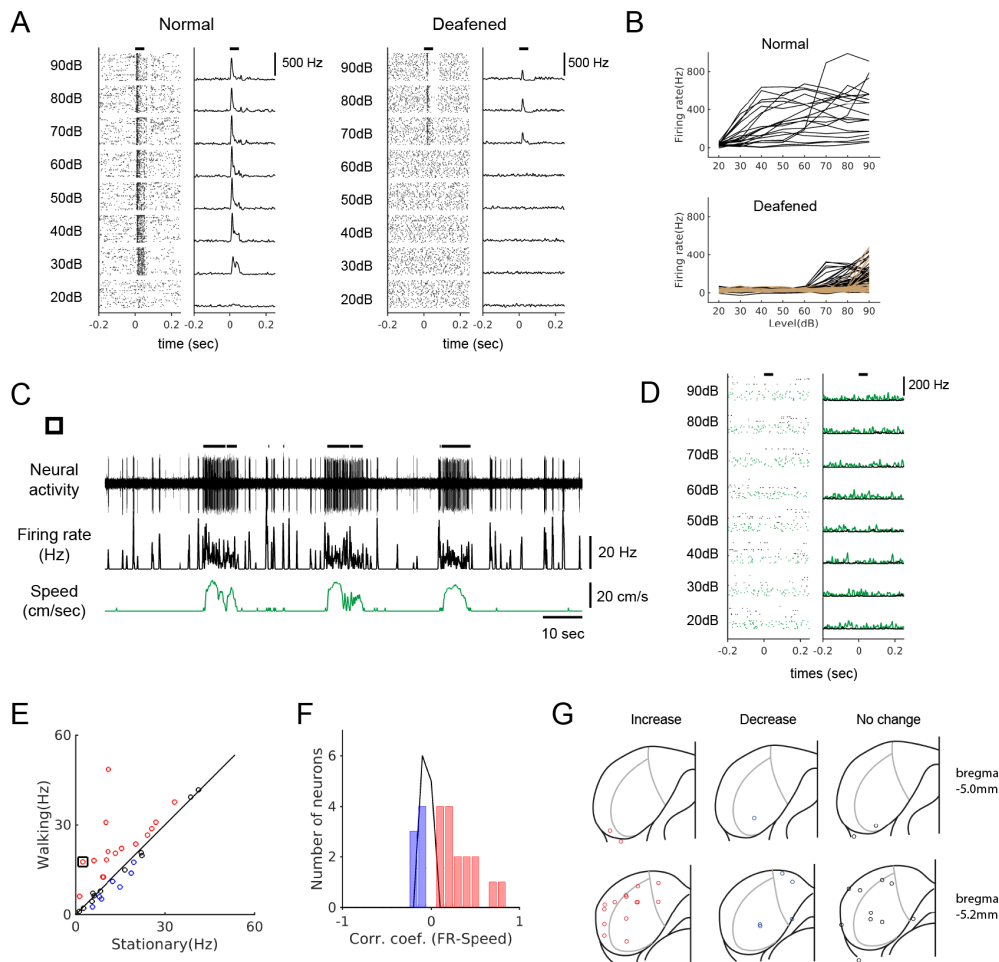

**Figure 4.** Locomotion modulates spontaneous activity in deafened mice. **(A)** Raster plots (30 trials shown for each level) and PSTHs of multi-unit responses to broadband sound (2-64 kHz, 50 msec duration) in example sites from normal (left) and deafened (right) mice. Horizontal bars at the top denotes the period of stimulus presentation. **(B)** Rate-level functions from multi-unit sites from a normal mouse (top, 20 sites) and two deafened mice (bottom, 40 sites (black) and 57 sites (brown); colors represent different mice, and curves from only two mice are shown for clarity). **(C)** Example neuron from a deafened mouse that showed robust modulation in firing rate during locomotion. Thick black lines above the neural record indicate walking periods. **(D)** The neuron in C did not show any auditory response to broadband noise (black: stationary, green: locomotion). In the raster plots, 30 stationary trials (black dots) and 8-10 walking trials (green dots) are shown for each level. **(E)** Scatter plot comparing the average spontaneous firing rates between stationary and walking conditions in deafened mice ( $n = 34$ ). Red: increase; blue: decrease; black: no significant change. Black square indicates the neuron in C. **(F)** Histogram of correlation coefficients (color code as in E). **(G)** Reconstructed recording locations as in Figure 1. Color code as in E.

187

188

189 Figure 4E and 4F). We also anatomically confirmed that our recording sites in deafened

190 mice were in the IC, and as in normal mice, modulated neurons were found across the IC

191 without any spatial patterns (Figure 4G).

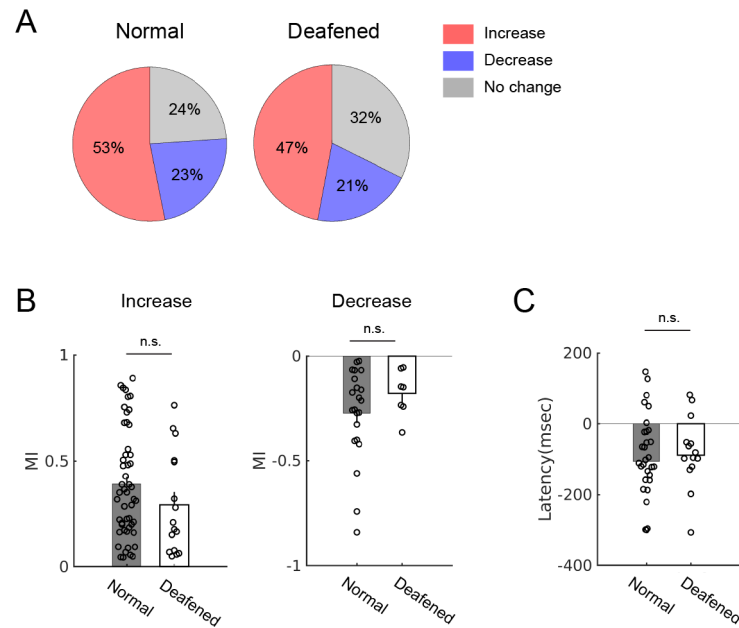

**Figure 5.** Modulation of spontaneous activity is similar between normal hearing and deafened mice. **(A)** Proportions of the types of modulation: increase, decrease, or no change. Normal:  $n = 96$ , deafened:  $n = 34$ . **(B)** Modulation index (MI) comparison between normal and deafened mice in neurons that showed positive (left; normal:  $n = 51$ ; deaf:  $n = 16$ ;  $t$  test,  $p = 0.18$ ) or negative modulation (right; normal:  $n = 22$ ; deaf:  $n = 7$ ;  $t$  test,  $p = 0.28$ ). **(C)** Latencies of neural activity modulation onset relative to locomotion onset (normal:  $n = 30$ ; deafened:  $n = 14$ ; Wilcoxon rank sum test,  $p = 0.65$ ).

192

193 Locomotion-related modulation of spontaneous activity in deafened mice was similar to that  
194 in normal hearing mice in several respects. First, the proportions of neurons for each  
195 category of firing rate change – increase, decrease, or no change – were comparable  
196 (Figure 5A). Second, the degree of modulation, as measured by the modulation index (MI),  
197 was comparable between the two groups in both positively (Figure 5B, left; normal:  $0.39 \pm$   
198  $0.04$ ,  $n = 51$ ; deaf:  $0.29 \pm 0.06$ ,  $n = 16$ ;  $t$  test,  $p = 0.18$ ) and negatively modulated neurons  
199 (Figure 5B, right; normal:  $-0.27 \pm 0.05$ ,  $n = 22$ ; deaf:  $-0.18 \pm 0.04$ ,  $n = 7$ ;  $t$  test,  $p = 0.28$ ).  
200 Third, latencies of modulation onset (Figure 5C; median latencies normal:  $-107$  msec  $n = 30$ ;  
201 deaf:  $-89$  msec,  $n = 14$ ; Wilcoxon rank sum test,  $p = 0.65$ ) were also comparable. The  
202 existence of locomotion-modulated neurons in deafened mice with shared characteristics  
203 provides strong evidence that non-auditory signals modulate the activity of IC neurons  
204 during locomotion.

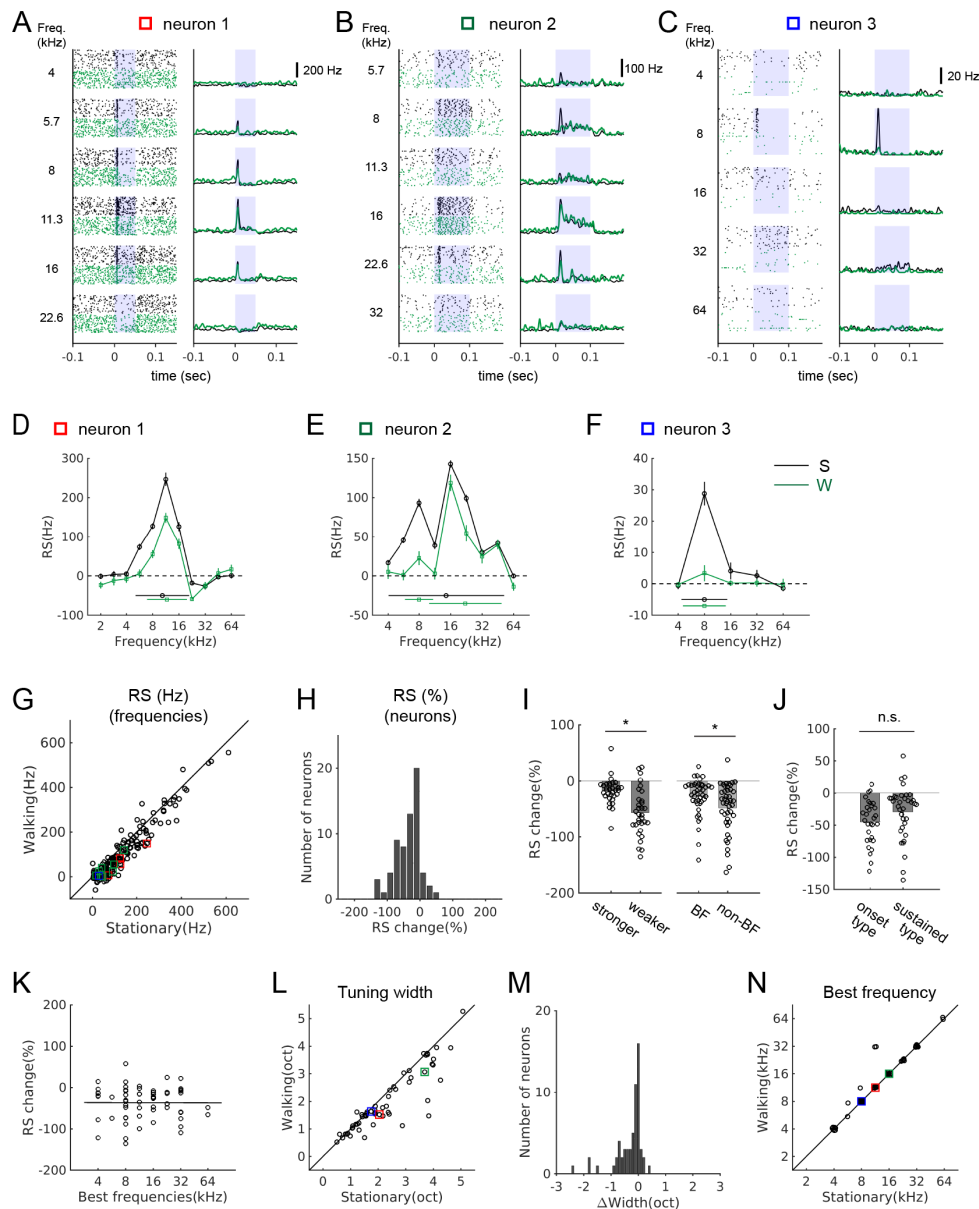

**Figure 6.** Sound-evoked activity of IC neurons is attenuated during locomotion. **(A-C)** Tone-evoked responses from three example IC neurons. Black spike rasters and PSTHs are from stationary trials, and green from walking trials. In each neuron, the same number of trials is shown for each condition (A: 35 trials; B: 25 trials; C: 92 trials). Blue shades indicate the period of sound stimulus presentation. Squares in different colors indicate the data points corresponding to the examples in the population plots in G, L, and N. **(D-F)** Tuning curves (black: stationary, green: walking) based on response strength (RS, baseline subtracted average firing rates at stimulus onset; see Methods). Tuning widths are shown as horizontal bars in each condition (with the centroid shown as a circle at the center). The tuning curves are from the neurons shown in A-C, respectively. **(G)** Comparison of RS values between the stationary and walking conditions at all frequencies with excitatory responses (178 tones, 65 neurons). Values from the example neurons in A-C are indicated as squares in corresponding colors. **(H)** Histogram of percent changes in RS values across the recorded neurons ( $n = 65$ ). One sample  $t$  test for the zero mean,  $p = 1.4 \times 10^{-10}$ . **(I)** Comparison of the percent change in RS during locomotion between neurons with weaker and stronger RS (the left two bars; stronger: above the median,  $n = 33$ ; weaker: below the median,  $n = 32$ ;  $t$  test,  $p = 0.0175$ ), or

between best and non-best frequencies (BF vs. non-BF) (the right two bars;  $n = 43$  of 65 neurons that had RS values at both best and non-best frequencies; paired  $t$  test,  $p = 6.98 \times 10^{-4}$ ). Each data point denotes a neuron. (J) Percent change in RS during locomotion in neurons with responses only at the onset vs. neurons with sustained responses (onset type:  $n = 30$ ; sustained type:  $n = 35$ ;  $t$  test,  $p = 0.103$ ). (K) Scatter plot of percent change in RS as a function of best frequencies ( $n = 65$ ;  $r = -0.0031$ ,  $p = 0.98$ ). (L) Frequency tuning widths in octaves for stationary and walking conditions. (M) Histogram of tuning width changes ( $n = 60$ , one sample Wilcoxon signed rank test,  $p = 3.0 \times 10^{-7}$ ; mean change =  $-0.29$  octaves). (N) Comparison of best frequencies ( $n = 60$ ). In L-N, neurons that lost all excitatory responses in the walking condition, yielding the tuning width of zero, were not included ( $n = 5$ ).

205

206

### 207 **Sound-evoked activity of IC neurons is attenuated during locomotion**

208 Attenuation of sound-evoked activity during locomotion has been shown in the auditory  
209 thalamus and cortex, but sources of subcortical attenuation remain unclear (Schneider et al.,  
210 2014; Zhou et al., 2014; Williamson et al., 2015; McGinley et al., 2015). We investigated  
211 whether the sound-evoked activity in the IC is also modulated during locomotion by  
212 presenting pure tones of different frequencies at 70 dB (Figure 6).

213

214 We found that most of IC neurons with excitatory tone-evoked responses (measured as  
215 response strength, or RS; see Methods) showed significant attenuation during locomotion  
216 (72%,  $n = 47/65$ ; Figure 6A-C and G). Percent changes in evoked response across the  
217 population showed a significant shift toward negative values (Figure 6H,  $n = 65$ ; one sample  
218  $t$  test,  $p = 1.4 \times 10^{-10}$ ) with a mean change of  $-36 \pm 5\%$ . Percent attenuation was greater in  
219 neurons with relatively weaker responses (below the median) than in neurons with stronger  
220 responses (above the median) (Figure 6I, left;  $-17 \pm 4\%$  (stronger,  $n = 33$ ) vs.  $-56 \pm 7\%$   
221 (weaker,  $n = 32$ );  $t$  test,  $p = 0.0175$ ). Within a neuron, the average attenuation at non-best  
222 frequencies were greater than at a neuron's best frequency (Figure 6I, right;  $n = 43$ ,  $-27 \pm$   
223  $5\%$  (BF) vs.  $-48 \pm 7\%$  (non-BF), paired  $t$  test,  $p = 6.98 \times 10^{-4}$ ). The greater attenuation of  
224 weaker responses within and across neurons may improve signal-to-noise ratio across the  
225 population of neurons during locomotion.

226

227 To examine whether the degree of attenuation depends on response properties of a neuron,  
228 we divided the IC neurons into two response types: one that showed response only at the  
229 onset of a stimulus (e.g., Figure 6C;  $n = 30$ ), and the other that showed sustained response  
230 throughout a stimulus (e.g., Figure 6B;  $n = 35$ ). Although the average attenuation was less in  
231 the neurons with sustained response, the difference was not statistically significant (Figure  
232 6J;  $-45 \pm 6\%$  vs.  $-29 \pm 7\%$ ;  $t$  test,  $p = 0.103$ ). The degree of attenuation also did not correlate  
233 with best frequencies, indicating the attenuation was global, rather than specific to certain  
234 frequencies (Figure 6K,  $n = 65$ ;  $r = -0.0031$ ,  $p = 0.98$ ).

235

236 Attenuation of evoked activity indicates a decrease in response gain, and this may affect the  
237 frequency selectivity of a neuron. To examine this possibility, we constructed frequency  
238 tuning curves and quantified tuning widths as the spread around the centroid (see Methods;  
239 Escabi et al., 2007; Ono et al., 2017; Figure 6D-F, L, M). In the stationary condition, the  
240 tuning widths ranged from 0.5 to 5 octaves with a mean of 2.2 octaves ( $n = 65$ ). During  
241 locomotion, there was a significant decrease in the tuning widths across the population  
242 (Figure 6L-M,  $n = 60$ , excluding 5 neurons with tuning width of zero in walking condition due  
243 to near complete suppression; one sample Wilcoxon signed rank test,  $p = 3.0 \times 10^{-7}$ ; mean  
244 change =  $-0.29$  octaves). In contrast, best frequencies did not change during locomotion in  
245 the vast majority of the neurons ( $n = 60$ , Figure 6N). Together, these results demonstrate  
246 sound-evoked activity in the IC is attenuated during locomotion, and this attenuation  
247 significantly sharpens frequency tuning across the population.

248

#### 249 **Attenuation of sound-evoked activity can occur independent of spontaneous activity** 250 **modulation**

251 Having found locomotion-related modulation in both spontaneous and sound-evoked activity,  
252 we asked whether there is any relationship between the two, which might indicate shared



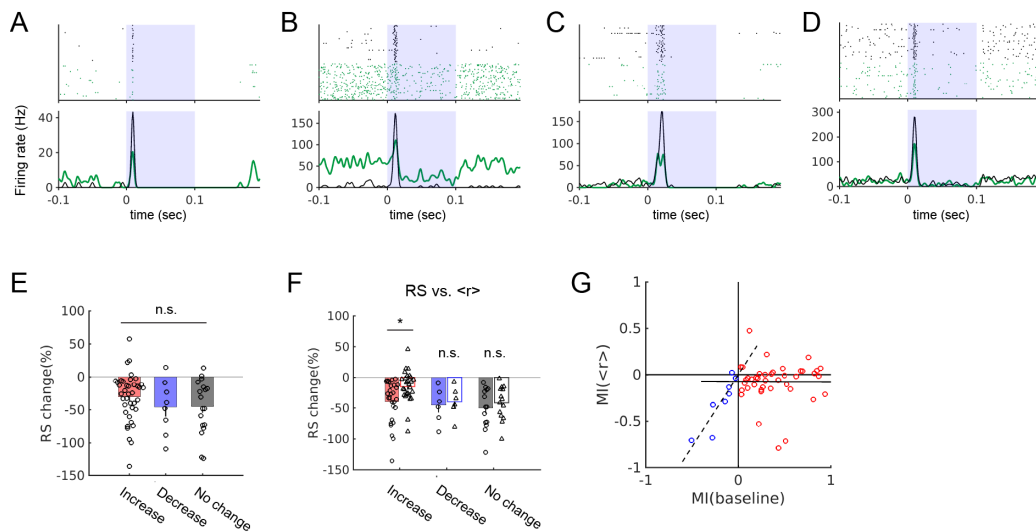

**Figure 7.** Relationships between the locomotion-related modulation of spontaneous and tone-evoked activity. **(A-D)** Tone-evoked responses in four example neurons with different types of spontaneous activity modulation during locomotion: increase (A-B), decrease (C), or no change (D). In raster plots and PSTHs, black indicates stationary and green indicates walking trials. **(E)** Attenuation of evoked activity (RS) in the groups with different types of spontaneous activity modulation. Red: increase,  $n = 39$ ; blue: decrease,  $n = 8$ ; gray: no change,  $n = 18$ . **(F)** Attenuation of evoked rates with or without baseline rate subtraction (RS vs.  $\langle r \rangle$ ) in the three groups in E. These comparisons were made only in neurons that showed significant evoked response attenuation ( $t$  tests, red:  $n = 27$  of 39,  $p = 0.0035$ ; blue:  $n = 6$  of 8,  $p = 0.72$ ; gray:  $n = 14$  of 18,  $p = 0.47$ ). Color coding is the same as in E. **(G)** Pairwise scatter plot of modulation index (MI) for spontaneous rates and  $\langle r \rangle$ . MI(spontaneous) and MI( $\langle r \rangle$ ) values are shown for neurons with positive spontaneous activity modulation (red;  $n = 39$ ;  $r = -0.0044$ ,  $p = 0.98$ ) and negative spontaneous activity modulation (blue;  $n = 8$ ;  $r = 0.899$ ,  $p = 0.0024$ ). Corresponding linear fits are shown in solid (for red circles) and dashed (blue circles) lines.

253 neural mechanisms. When we compared the modulation of evoked activity across different  
 254 types of spontaneous activity modulation (increase:  $n = 39$ , Figure 7A-B; decrease:  $n = 8$ ,  
 255 Figure 7C; no change:  $n = 18$ , Figure 7D), evoked activity was attenuated during locomotion  
 256 in all three groups, and the degrees of attenuation did not differ significantly among the  
 257 groups (Figure 7E; increase (red):  $-31 \pm 6\%$ ,  $n = 39$ ; decrease (blue):  $-46 \pm 15\%$ ,  $n = 8$ ; no  
 258 change (gray):  $-45 \pm 10\%$ ,  $n = 18$ ; one way ANOVA,  $p = 0.32$ ). Thus, attenuation of evoked  
 259 activity during locomotion can occur independent of the modulation of spontaneous activity.  
 260  
 261 In the group with increased spontaneous activity, we also examined whether the attenuation



262 in the evoked activity is simply due to the increased baseline firing rate. In neurons that  
263 showed attenuation ( $n = 27/39$ ), the percent change in firing rates during sound presentation  
264 without baseline subtraction (denoted as  $\langle r \rangle$ ) was significantly smaller than the change in  
265 RS. Therefore, in this group, the modulation of spontaneous activity played a significant role  
266 in our measurement, but it didn't entirely account for the attenuation (Figure 7F, red bars,  $-40$   
267  $\pm 7\%$  vs.  $-15 \pm 5\%$ ,  $t$  test,  $p = 0.0035$ ,  $n = 27$  of 39). In the group with decreased  
268 spontaneous activity, the change in RS did not differ from the change in  $\langle r \rangle$  (Figure 7F, blue  
269 bars,  $-45 \pm 12\%$  vs.  $-40 \pm 10\%$ ,  $p = 0.72$ ,  $n = 6$  of 8). This was also true, as expected, for the  
270 group with no significant modulation of spontaneous activity (Figure 7F, gray bars,  $-50 \pm 9\%$   
271 vs.  $-42 \pm 7\%$ ,  $p = 0.47$ ,  $n = 14$  of 18).

272

273 Finally, we asked whether there is a relationship between the magnitude of spontaneous  
274 activity modulation and evoked activity modulation. For this analysis we used modulation  
275 index (MI) for the spontaneous rates and  $\langle r \rangle$ . In the group with increased spontaneous  
276 activity, the magnitude of the increase did not correlate with the modulation in  $\langle r \rangle$  ( $n = 39$ ,  
277 solid line,  $r = -0.0044$ ,  $p = 0.98$ ; Figure 7G). In contrast, in the group with decreased  
278 spontaneous activity, the magnitude of decrease showed a significant positive correlation  
279 with the modulation in  $\langle r \rangle$  ( $n = 8$ , dashed line,  $r = 0.899$ ,  $p = 0.0024$ ; Figure 7G). These  
280 results suggest that the suppression of spontaneous and evoked activity may share common  
281 neural mechanisms, whereas the increase in spontaneous activity during locomotion may  
282 result from distinct sources.

283

284

285

286

287

288

## 289 **Discussion**

290

291 By recording single unit activity in the IC of behaving mice, we found that locomotion can  
292 bidirectionally modulate spontaneous activity of IC neurons. The modulation preceded  
293 locomotion onset, was not mimicked by playback of sounds generated by locomotion, and  
294 occurred also in deafened mice. Furthermore, sound-evoked activity was attenuated during  
295 locomotion, and frequency selectivity increased. Our results reveal locomotion-related neural  
296 signals at this relatively early stage of the auditory pathway. The prevalence of the clear  
297 movement-related signals suggests that multi-modal integration of movement and sound is  
298 an essential part of sound processing in the IC.

299

### 300 **Modulation of neural activity by locomotion in the IC**

301 We found that in ~50% of the recorded IC neurons, spontaneous firing rates increased  
302 during locomotion, while in ~25%, firing rates decreased. This modulation of spontaneous  
303 activity contrasts with the findings of prior studies in the MGB, where spontaneous firing did  
304 not significantly change during locomotion (Zhou et al., 2014; Williamson et al., 2015;  
305 McGinley et al., 2015). Our results show that the modulation during locomotion can be  
306 strong and is wide spread in the IC, so it is unlikely that the altered activity does not  
307 propagate to the MGB. One plausible explanation of the discrepancy is that the modulation  
308 of IC spiking activity primarily evokes subthreshold responses in thalamic neurons, making it  
309 difficult to detect in terms of firing rate changes. However, subthreshold inputs could still  
310 modulate sound-evoked activity (Jain and Shore, 2006) and could thus contribute to the  
311 suppression of evoked activity shown in the MGB during locomotion (Williamson et al., 2015;  
312 McGinley et al., 2015).

313

314 To better understand the impact of the modulation on the IC circuits, it will be important to  
315 determine whether directions or degrees of modulation differ in different cell types. For

316 example, in A1, a major mechanisms of locomotion-related modulation is feedforward  
317 inhibition in which the motor cortex inputs excite fast-spiking inhibitory interneurons, which in  
318 turn suppresses excitatory neurons (Schneider et al., 2014). In contrast to cortical neurons  
319 (Niell and Stryker, 2010), in the IC, recordings from genetically labeled neurons have shown  
320 that excitatory and inhibitory neurons cannot be distinguished based on spike waveforms  
321 (Ono et al., 2017). Furthermore, defining cell types beyond excitatory and inhibitory neurons  
322 remains a challenge in the IC, and different cell types and their connectivity are only  
323 beginning to be understood (Oliver et al., 1994; Ito et al., 2009; Beebe et al., 2016; Chen et  
324 al., 2018; Goyer et al., 2019; Schofield and Beebe, 2019). Making recordings from defined  
325 IC cell types in the future would enable investigations of questions such as whether excited  
326 neurons vs. suppressed neurons are different types of neurons in the IC, or how the network  
327 as a whole is modulated.

328

329 While spontaneous activity was modulated bidirectionally, evoked activity was attenuated in  
330 the vast majority of IC neurons. This attenuation was general rather than selective in that it  
331 occurred across neurons with different best frequencies, both at best and non-best  
332 frequencies of a neuron, and regardless of temporal response patterns. In contrast to  
333 spontaneous activity, the attenuation of evoked activity is consistent with the findings in the  
334 MGB. Although it is not straightforward to compare the degree of modulation, comparable  
335 amount of attenuation of evoked activity has been shown in the MGB (~15-25% in  
336 Williamson et al., 2015; ~50% in McGinley et al., 2015). Therefore, a significant portion of  
337 the attenuation observed in the MGB already occurs in the IC.

338

339 Interestingly, the attenuation of evoked activity led to a decrease in frequency tuning widths,  
340 indicating increased neural selectivity for sound frequency (Fig. 6L-M). Across the  
341 population, we observed an average tuning width decrease of ~0.3 octaves. Behavioral  
342 studies indicate that mice can discriminate at least ~10% difference (~0.14 to 0.15 octaves)

343 in frequency (Ehret, 1975; Clause et al., 2011; de Hoz and Nelken, 2014; Guo et al., 2017).  
344 Thus, the observed changes in tuning widths is large enough to have significant impact on  
345 the sound frequency processing. The attenuation of sound-evoked activity may decrease the  
346 sensitivity to sounds, as supported by poorer performance on tone detection tasks during  
347 locomotion (McGinley et al., 2015; Schneider et al. 2018). On the other hand, the observed  
348 increase in frequency selectivity in IC neurons may improve frequency discrimination  
349 (Aizenberg et al., 2015; Carcea et al., 2017; Guo et al., 2017).

350

### 351 **Potential sources of modulation during locomotion**

352 It is likely that the observed modulation has multiple neural sources, as indicated by the  
353 result that evoked modulation can occur independent of spontaneous modulation (Figure 7).  
354 One obvious candidate, however, is somatosensory feedback during movement. The IC  
355 receives inputs from the somatosensory areas in the brainstem and the cortex (Cooper and  
356 Young, 1976; Aitkin et al., 1978; Robards, 1979; Coleman and Clerici, 1987; Kunzle, 1998;  
357 Zhou and Shore, 2006; Lesciko et al., 2016; Olthof et al., 2019), and sound-evoked activity  
358 is modulated by concurrent stimulation of somatosensory afferents (Aitkin et al., 1978; Jain  
359 and Shore, 2006). While the exact functions of the somatosensory inputs during behavior  
360 still remain poorly understood, our results suggest that a major function of the  
361 somatosensory inputs to the IC is to provide feedback about ongoing movement.

362

363 The somatosensory projections predominantly innervate the lateral cortex of the IC (Kunzle,  
364 1998; Zhou and Shore, 2006; Lesicko et al., 2016), but our anatomical reconstruction of  
365 recording locations indicate modulated neurons are distributed throughout the IC (Figure  
366 1E). Neurons in the central nucleus may receive somatosensory inputs from the lateral  
367 cortex via connections within the IC (Rockel and Jones, 1973; Coleman and Clerici, 1987;  
368 Jen et al., 2001; Chen et al., 2018), or from the dorsal cochlear nucleus (Li and Mizuno,  
369 1997; Oertel and Young, 2004; Shore 2005; Goyer et al., 2019), which receives

370 somatosensory feedback during behavior (Kanold and Young, 2001; Singla et al., 2017).  
371 Descending inputs from the somatosensory cortex, spread out across the IC subdivisions,  
372 may also play a role (Olthof et al., 2019). Regardless of the precise neural mechanisms, our  
373 results suggest that movement-related somatosensory feedback signals are more wide  
374 spread across the IC than previously hypothesized.

375

376 Our timing analysis shows a substantial fraction of IC neurons change their firing prior to  
377 (~100 msec) movement onset (Figure 2). This relative timing is compatible with efference  
378 copy of motor signals, or neuromodulatory signals associated with movements, which has  
379 been described in A1 (Nelson et al., 2013; Schneider et al., 2014; Nelson and Mooney,  
380 2016; Reimer et al., 2016). In fact, the IC receives inputs from a number of motor-related  
381 regions and neuromodulatory centers likely associated with locomotion. First, IC neurons  
382 receive inputs from the superior colliculus, a highly multi-modal area, whose neurons are  
383 also modulated by locomotion (Ito et al., 2017), and the motor cortex (Olthof et al., 2019).  
384 Second, the IC receives inputs from midbrain cholinergic neurons in the peduncular pontine  
385 nucleus (Farley et al., 1983; Motts and Schofield, 2009), which is part of the midbrain  
386 locomotion region (Lee et al., 2014; Caggiano et al., 2018). Third, the IC receives  
387 noradrenergic inputs from the locus coeruleus (Klepper and Herbert, 1991; Hormigo et al.,  
388 2012), which are likely to be active during locomotion (Reimer et al., 2016). Therefore, IC  
389 neurons could receive rich information about body movement via both efference copy like  
390 signals from motor-related regions and somatosensory feedback. These signals may work  
391 together to inform IC neurons of ongoing movements to be integrated with sound  
392 processing.

393

#### 394 **Implications for sound processing and sound-guided behavior**

395 In the visual system, visual responses are stronger during locomotion, and this increased  
396 gain enhances visual function (Niell and Stryker, 2010; Mineault et al., 2016; Dadarlat and

397 Stryker, 2017; Ito et al., 2017). In contrast, in the auditory pathway, it has been consistently  
398 observed that auditory responses are suppressed during motor behavior, including  
399 locomotion (Creutzfeld et al., 1989; Eliades and Wang, 2013; Singla et al., 2017; Schneider  
400 and Mooney, 2018). This suppression is thought to help maintain sensitivity to sounds by  
401 preventing desensitization and help distinguish self-generated and external sounds (Poulet  
402 and Hedwig, 2002; Schneider et al., 2018). The general attenuation of auditory response we  
403 observed in the IC is in line with this sound processing strategy. However, the integration of  
404 auditory and movement-related signals in the IC may have additional functional  
405 consequences such as a trade-off between detection and discrimination, as suggested by  
406 the ways IC tuning curves changed.

407

408 The movement-related signals in the IC may also enable rapid control of behavioral  
409 response to a sound source. The IC has been implicated in mediating acousticomotor  
410 behavior by conveying auditory information to motor-related areas, such as the superior  
411 colliculus and the periaqueductal gray (Huffman and Henson, 1990; Xiong et al., 2015).  
412 Integrating neural signals related to body movement and posture at the level of auditory  
413 midbrain could help localize a sound source and generate rapid response toward or away  
414 from it. Through this multi-modal integration, the IC may take part in the midbrain sensory-to-  
415 motor circuits that allow rapid control of sound-driven behaviors.

416

417

418

419

420

421

422

423

## 424 **Materials and Methods**

425

### 426 *Animals*

427 All experiments performed were approved by the Institutional Animal Care and Use  
428 Committee of Sungkyunkwan University in accordance with the National Institutes of Health  
429 guidelines. Neural recordings have been performed in C57BL/6 mice (n = 15 mice) or a  
430 transgenic mouse line (VGAT-ChR2-EYFP line with C57BL/6J background; n = 10 mice) of  
431 both sexes, aged 6-10 weeks. In the current study, we did not make use of the transgene  
432 expression in the transgenic line. We did not find differences in the degree of modulation in  
433 spontaneous or evoked activity between the two strains.

434

### 435 *Headpost surgery*

436 For neural recordings in a head-fixed preparation, a custom metal headpost was cemented  
437 to the skull. Mice were positioned in a stereotaxic device (Kopf Instrument) and anesthetized  
438 using Isoflurane (1-4%) delivered via a vaporizer (DRE Veterinary). An eye ointment was  
439 applied to keep the eyes from drying. A small amount of lidocaine (2%) was injected under  
440 the skin overlying the skull, and an incision was made to expose the skull. The connective  
441 tissues were gently removed, and the skull surface was allowed to dry. The head was  
442 positioned such that difference in the dorso-ventral coordinates of the bregma and lambda  
443 was less than 100  $\mu\text{m}$ . A small ground screw was cemented toward the rostral end of the  
444 exposed skull surface. For future craniotomy over the inferior colliculus (IC), markings were  
445 made around 5 mm posterior to the bregma. A metal headpost was positioned not to  
446 obstruct future access to the IC and was secured using dental cement (Super-bond C&B).

447

### 448 *Neurophysiology*

449 Mice were acclimated to head-fixing and walking on a passive disc-type treadmill for 2-4  
450 days (one 30 min session per day) prior to neurophysiological recordings. On the day of

451 neural recording, a cranial window (~1 mm) was made over the IC under isofluorane  
452 anesthesia (1-4%). The window was covered with Kwik-Cast (WPI) and mice were allowed  
453 to recover for at least 2 hours. Recordings were made from the IC (AP ~5.0 mm posterior to  
454 the bregma, ML ~0.4-1.8mm from the midline) using either a single tungsten electrode or a  
455 linear array of tungsten electrodes (~5 M $\Omega$ , FHC). The electrodes were controlled by a  
456 single-axis motorized micro-manipulator (IVM Mini, Scientifica). Neural signals were  
457 acquired using a 16-channel headstage (RHD2132, Intan Technologies) and Open Ephys  
458 data acquisition hardware and software. Spiking activity was band-pass filtered (600-6000  
459 Hz) and digitized at 30 kHz. Locomotion on a treadmill was detected using a rotary encoder  
460 (Scitech Korea), and the output voltage signal was recorded as analog and digital inputs for  
461 further analysis.

462

#### 463 *Sound stimuli*

464 Pure tone stimuli with a sampling rate of 400 kHz were generated in MATLAB (MathWorks),  
465 and presented at 70 dB SPL using a D/A converter (PCIe-6343, National Instruments), a  
466 power amplifier (#70103, Avisoft), and an ultrasonic speaker (Vifa, Avisoft). The sound  
467 system was periodically calibrated for each tone stimulus frequency using a ¼" microphone  
468 (Bruel & Kjaer 4939). During neurophysiological recordings, the speaker was placed 15 cm  
469 from the animal's right ear at 45 degrees from the body midline. In initial recordings, the tone  
470 stimulus set consisted of frequencies between 4 kHz and 64 kHz in one octave steps  
471 (duration: 100 msec; on and off ramps: 1 msec; presented pseudorandomly at 2 Hz). In  
472 subsequent experiments, to better estimate frequency tuning, tone stimuli were presented at  
473 frequencies between 2 kHz and 64 kHz in half octave steps (duration: 50 msec; on and off  
474 ramps: 1 msec; presented pseudorandomly at 4 Hz). Each tone stimulus was repeated at  
475 least 20 times, but typically much more (mean: 131 trials; range: 20-320). Broadband noise  
476 stimuli (2-64 kHz) for assessing hearing thresholds were 50 msec long (5 msec on and off  
477



478 ramps) and presented at 20 to 90 dB SPL in 10 dB steps in pseudorandom order. Each  
479 sound level was repeated at least 50 times.

480

481 Sounds generated by locomotion on our treadmill were recorded by placing a microphone  
482 (CM16/CMPA, Avisoft) close to the legs. The recorded sound signal was bandpass filtered  
483 (1kHz-25kHz), and subjected to a noise reduction procedure to reduce the baseline noise  
484 using Audition (Adobe). The sound level of walking sounds was estimated by comparing  
485 recorded walking sounds with a series of recorded playbacks at different levels (20 to 50 dB  
486 in 5 dB steps). Recorded playback at 30 dB had an RMS value similar but slightly higher  
487 than that of the recorded walking sounds. Therefore, a representative 2 second recording  
488 was used as a playback stimulus. The stimulus was presented at 30 dB SPL and repeated at  
489 least 20 times.

490

491 Sound stimuli were presented using a custom-written stimulus presenter program written in  
492 Python 2.7 (by Jeff Knowles; <https://bitbucket.org/spikeCoder/kranky>), which communicated  
493 with Open Ephys GUI software (<http://www.open-ephys.org/gui>).

494

#### 495 *Deafening*

496 To prevent mice from hearing sounds generated by locomotion, a bilateral deafening  
497 procedure was performed. Mice were anesthetized by intraperitoneal injection of Ketamine/  
498 Xylazine (100mg/10mg per kg). A small incision was made ventral and posterior to the pinna.  
499 To expose the auditory bulla that surrounds the middle ear cavity, the overlying tissue was  
500 gently spread using fine forceps. An opening was made in the bulla to visualize the ossicles  
501 and the cochlea. The ossicles were removed and kanamycin drops (1 mg/ml) were applied  
502 3-4 times at the oval window of the cochlea in an attempt to induce further hair cell damage.  
503 The middle ear cavity was filled with gelfoam, the overlying tissue was closed, and the skin

504

505 was sutured. Mice were given analgesics (meloxicam, 5mg/kg) and allowed to recover for  
506 2-3 days before receiving headpost surgery for neural recording.

507

#### 508 *Data analysis*

509 Spikes were detected and sorted offline using commercial spike sorting software (Offline  
510 Sorter v4, Plexon). Detected spike waveforms were clustered using PCA, and clusters with a  
511 clear separation in PC space was taken as single units. A refractory period of 0.7 msec was  
512 imposed, and the rate of refractory period violation was required to be less than 0.5%.

513

514 Spontaneous activity was measured either from the baseline period that preceded a tone  
515 presentation (0.1 or 0.2 sec) or from 1-sec segments of a continuous recording of  
516 spontaneous activity (> 200 sec). Periods of locomotion was determined by thresholding the  
517 speed of the treadmill at 2 cm/sec, obtained by smoothing the digital recordings of the  
518 treadmill sensor output (200 msec hanning filter; a transition from low to high, or vice versa,  
519 corresponded to 0.26 cm). During the stationary periods, occasional short blips of movement  
520 occurred, but otherwise, the speed was zero. The segments of spontaneous activity was  
521 assigned to either stationary or walking condition, and only the segments that occurred  
522 entirely during one of the behavioral conditions were included for analysis.

523

524 To analyze the timing of neural modulation relative to movement onset (Figure 2), walking  
525 periods with clear onsets were identified. Then, for each walking period, the onset was  
526 defined as the time when the treadmill sensor output changed by 2% (corresponding to < 1  
527 mm of travel) of the maximum range (2.5V). Once locomotion onsets (= onset(L)) were  
528 defined, onset-triggered averaging of the smoothed firing rate was performed. The onset of  
529 neural activity modulation (= onset(M)) was defined as the time when the 95% confidence  
530 interval of the onset(L)-triggered firing rate first deviated from the average stationary rate by  
531 2 times the standard deviation. The confidence intervals were obtained using bootstrap

532 resampling of the onset(L)-triggered firing rate segments. Latency of modulation was defined  
533 as the time of onset(M) - the time of onset(L). Clear onset(L)-triggered averages and  
534 modulation onset latency could be defined in a subset of neurons with significant modulation  
535 (normal: n = 30 of 63 modulated neurons; deaf: n = 14 of 23 modulated neurons) due to not  
536 enough locomotion onsets or relatively weak modulation.

537

538 To assess the effect of deafening, multi-unit responses to broadband noise (2-64 kHz) were  
539 examined across the IC for a range of sound levels in 10 dB steps (20-90 dB). Multi-unit  
540 spike times were obtained by thresholding the neural recordings at 3 times the standard  
541 deviation of the baseline noise. Rate-level curves were constructed based on the peak  
542 evoked firing rates (Figure 4A-B). Rate-level curves were obtained from a few tens of multi-  
543 unit sites for each deafened mouse (4 mice,  $43 \pm 13$  sites per mouse).

544

545 To compare the degrees of modulation between the normal hearing and deafened mice  
546 (Figure 5B), a modulation index was used:  $MI = [\langle r \rangle(\text{walk}) - \langle r \rangle(\text{stationary})] / [\langle r \rangle(\text{walk})$   
547  $+ \langle r \rangle(\text{stationary})]$ , where  $\langle r \rangle$  represents the average firing rate and MI values varied between  
548 -1 and +1 (Rummel et al., 2016). Because deafening decreased spontaneous firing rates  
549 ( $21.9 \pm 2.2$  Hz vs.  $14.3 \pm 1.8$  Hz), MI allowed us to compare the relative changes by  
550 locomotion. MI was also used to test whether modulations of spontaneous activity and  
551 evoked activity were correlated (Figure 7G).

552

553 Tone-evoked activity was analyzed in neurons with excitatory response to at least one of the  
554 presented tone frequencies. A significant response to a tone stimulus was determined using  
555 a paired *t* test between the firing rate during the baseline period preceding the tone and the  
556 firing rate during a response window. A response window was defined around the time of the  
557 peak of the smoothed peristimulus time histogram (PSTH) (from 5 msec before and to 7  
558 msec after the peak; smoothing by a Gaussian function with the standard deviation of 2

559 msec) at a neuron's best frequency (the tone frequency with the greatest peak response).  
560 The same response window was used for all stimuli in a given neuron. Tone-evoked activity  
561 was quantified as the average firing rate during a response window minus the spontaneous  
562 firing rate (Response Strength or RS; Doupe, 1997). Spontaneous firing rate was measured  
563 during a 100 or 200 msec period preceding each stimulus presentation. Evoked trials were  
564 assigned to either stationary or walking condition as in the spontaneous activity described  
565 above. Only neurons that had at least 5 repeats for a tone stimulus in both conditions were  
566 included (Stationary:  $131 \pm 47$  trials per stimulus; Walking:  $40 \pm 26$  trials per stimulus).  
567 Modulation of evoked activity was quantified as percent change in RS ( $100 * [RS(\text{walking}) -$   
568  $RS(\text{stationary})] / [RS(\text{stationary})]$ ). Percent change in RS for a neuron was defined as percent  
569 change in RS summed over all responsive tone frequencies. Modulation analysis using a  
570 fixed 15 msec response window starting 5 msec after the sound onset yielded similar  
571 results.

572

573 Tuning curves were constructed from the average evoked firing rates (RS) at different tone  
574 frequencies. To quantify tuning widths, tuning curves were first linearly interpolated between  
575 neighboring frequencies (100 points), and tuning widths were expressed as four times the  
576 second moment about the centroid, measured in octaves (Escabi et al., 2007; Ono et al.,  
577 2017). In rare cases ( $n = 2$ ) where multiple tuning width segments occurred due to a non-  
578 responsive tone in the middle, the widths were added up minus the overlap.

579

### 580 *Histology*

581 At the end of a recording session, small lesions were made by applying current (30  $\mu$ A, 10  
582 sec) through recording electrodes. Animals were transcardially perfused using PBS followed  
583 by 4% paraformaldehyde. Brains were post-fixed for at least a day and were cryoprotected  
584 in 30% sucrose before they were cut on a cryostat. Sections were cut at 40- $\mu$ m thickness,

585

586 mounted on slides, and processed for Nissl staining. Recording locations were estimated  
587 based on the locations of the lesion.

588

### 589 *Statistical analysis*

590 All statistical analysis was performed in MATLAB. The significance level was  $\alpha = 0.05$  except  
591 for spontaneous activity modulation, where  $\alpha = 0.01$ . Normality was assessed using Lilliefors  
592 test (lillietest function in MATLAB), and when data significantly deviated from normal  
593 distribution, non-parametric tests were used. Results are presented with mean  $\pm$  SEM  
594 unless otherwise noted.

595

596 Statistical significance of the modulation in spontaneous firing was determined using the  
597 mean firing rates from recording segments (see *Data analysis* above) during which no sound  
598 stimuli were presented. The spontaneous firing rates of the analyzed segments were  
599 generally not normally distributed, so the significance of the modulation was determined  
600 using a permutation test. In each permutation, segments of spontaneous activity from the  
601 stationary or walking groups were combined and then randomly assigned to two groups with  
602 the original sample sizes. A distribution of the differences of the means between the two  
603 groups was obtained from 1000 permutations. A two-tailed  $p$  value was obtained by  
604 calculating the probability that permuted differences were more extreme than the sample  
605 mean difference. For each neuron,  $p < 0.01$  was considered a significant modulation. Based  
606 on this analysis, neurons were categorized into 3 groups: neurons with increased or  
607 decreased spontaneous activity, or with no significant change (normal:  $n = 96$  neurons from  
608 21 mice; deafened:  $n = 34$  neurons from 4 mice; Figures 1C-E, 3F-G, 4E-G, 5A-B, and 7E-  
609 G).

610

611 In Figure 2D, a Wilcoxon rank sum test was performed to determine if median latencies of  
612 neural modulation relative to locomotion onset differed significantly between the neurons

613 with increased ( $n = 22$ ) and decreased ( $n = 8$ ) spontaneous firing rates during locomotion.  
614 Similarly in Figure 5C, latencies were compared between normal ( $n = 30$ ) and deafened  
615 mice ( $n = 14$ ).

616

617 In Figure 3, whether a neuron showed significant response to walking sound playback was  
618 determined using a paired  $t$  test between the baseline firing rate and the firing rate during the  
619 playback. For this analysis, only playback responses from stationary trials were used ( $17 \pm$   
620 5 trials). In Figure 3C, to determine whether the variances of the mean firing rate changes  
621 ( $\Delta\langle r \rangle$ ) during locomotion and playback differed significantly across the population, a two  
622 sample  $F$  test was performed (walking:  $n = 96$ ; playback:  $n = 25$ ). Randomly selecting 25  
623 neurons from the walking group did not change the result of the statistical test. In Figure 3F  
624 and 3G, Wilcoxon signed rank tests were performed for paired comparisons of the mean  
625 firing rate changes ( $\Delta\langle r \rangle$ ) during locomotion and playback in 19 modulated neurons out of  
626 25 with both measurements (Figure 3F:  $n = 13$  neurons in which locomotion increased firing;  
627 Figure 3G:  $n = 6$  neurons in which locomotion decreased firing).

628

629 In Figure 5B, to determine whether the degrees of modulation differed significantly between  
630 the normal and deafened mice,  $t$  tests were performed on MI values in the neurons with  
631 increased (Figure 5B, left; normal:  $n = 51$  of 96 neurons; deafened:  $n = 16$  of 34 neurons) or  
632 decreased spontaneous firing (Figure 5B, right; normal:  $n = 22$  of 96 neurons; deafened:  $n =$   
633 7 of 34 neurons). Statistical comparisons using percent changes in firing rate yielded similar  
634 results.

635

636 In the analysis of the modulation of evoked activity (Figure 6), of the 67 neurons in which  
637 tone stimuli evoked excitatory responses, 65 were included in the analysis. Two of the 67  
638 neurons that had unreliable percent change values due to RS values close to zero were  
639 excluded from the analysis. In Figure 6H, one sample  $t$  test was performed to determine

640 whether the population mean of percent changes in RS was significantly different from zero  
641 ( $n = 65$ ). In Figure 6I (two bars on the left), the 65 neurons were divided into two groups:  
642 those with relatively stronger (above the median,  $n = 33$ ) and weaker responses (below the  
643 median,  $n = 32$ ). Then a two sample  $t$  test was performed to determine whether RS change  
644 differed between the two groups. In Figure 6I (two bars on the right), percent changes in RS  
645 were compared between the best and non-best frequencies of a neuron using a paired  $t$  test  
646 ( $n = 43$  of 65 neurons with multiple frequencies with response). In Figure 6J, to determine  
647 whether percent RS change can differ depending on response types, a two sample  $t$  test  
648 was performed between neurons with onset responses only ( $n = 30$  neurons) vs. neurons  
649 with onset followed by sustained responses ( $n = 35$  neurons). In Figure 6K, whether the  
650 correlation coefficient between the best frequencies and the changes in RS was significantly  
651 different from zero was determined using a  $t$  test ( $n = 65$ ). In Figure 6M, whether the  
652 population median frequency tuning width change was significantly different from zero was  
653 determined using a one sample Wilcoxon signed rank test ( $n = 60$ ). In Figure 6L-N, neurons  
654 that lost all excitatory responses in the walking condition, yielding the tuning width of zero,  
655 were excluded ( $n = 5$ ).

656

657 In Figure 7E, percent change in RS was compared across the three different spontaneous  
658 activity modulation categories using one-way ANOVA (of 65 neurons analyzed for evoked  
659 response, 39 showed increase, 8 showed decrease, and 18 showed no change in  
660 spontaneous activity). In Figure 7F, percent change in firing rates during response window  
661 were compared between RS (baseline subtracted) and  $\langle r \rangle$  (without baseline subtraction) in  
662 each of the three spontaneous modulation categories. These comparisons were made using  
663  $t$  tests only in neurons that showed significant attenuation in RS (red:  $n = 27$  attenuated  
664 neurons of 39 neurons with increased spontaneous activity; blue:  $n = 6$  attenuated neurons  
665 of 8 neurons with decreased spontaneous activity; gray:  $n = 14$  attenuated neurons of 18  
666 neurons with no change in spontaneous activity). Whether the evoked activity was

667 significantly modulated by locomotion was determined using a two sample *t* test on RS  
668 values from stationary and walking trials. A neuron was considered modulated if there was a  
669 significant modulation in RS at least at one of the tone frequencies. In Figure 7G, to  
670 determine whether the correlation coefficient between the modulation of spontaneous rate  
671 and the evoked rate ( $\langle r \rangle$ ) was significantly different from zero, *t* tests were performed in the  
672 group with increased (n = 39) or decreased spontaneous activity (n = 8).

673

674

675

676

677

678

679

680



## **Acknowledgements**

This study was supported by the Institute for Basic Science in Korea (IBS-R015-D1). We thank Hyesook Lee for her help with histology, Dr. Seong-Gi Kim for helpful discussions and support, Drs. Karl Kandler and Mimi Kao for their critical comments on earlier versions of the manuscript.

## **Competing interests**

The authors declare no competing financial interests.

## References

- Adams JC. 1979. Ascending projections to the inferior colliculus. *J Comp Neurol* **183**:519–538. doi:[10.1002/cne.901830305](https://doi.org/10.1002/cne.901830305)
- Adams JC. 1980. Crossed and descending projections to the inferior colliculus. *Neurosci Lett* **19**:1–5. doi:[10.1016/0304-3940\(80\)90246-3](https://doi.org/10.1016/0304-3940(80)90246-3)
- Aitkin LM, Dickhaus H, Schult W, Zimmermann M. 1978. External nucleus of inferior colliculus: auditory and spinal somatosensory afferents and their interactions. *J Neurophysiol* **41**:837–847. doi:[10.1152/jn.1978.41.4.837](https://doi.org/10.1152/jn.1978.41.4.837)
- Aitkin LM, Kenyon CE, Philpott P. 1981. The representation of the auditory and somatosensory systems in the external nucleus of the cat inferior colliculus. *J Comp Neurol* **196**:25–40. doi:[10.1002/cne.901960104](https://doi.org/10.1002/cne.901960104)
- Aizenberg M, Mwilambwe-Tshilobo L, Briguglio JJ, Natan RG, Geffen MN. 2015. Bidirectional regulation of innate and learned behaviors that rely on frequency discrimination by cortical inhibitory neurons. *PLOS Biology* **13**:e1002308. doi:[10.1371/journal.pbio.1002308](https://doi.org/10.1371/journal.pbio.1002308)
- Bigelow J, Morrill RJ, Dekloe J, Hasenstaub AR. 2019. Movement and VIP interneuron activation differentially modulate encoding in mouse auditory cortex. *eNeuro* ENEURO.0164-19.2019. doi:[10.1523/ENEURO.0164-19.2019](https://doi.org/10.1523/ENEURO.0164-19.2019)
- Bock GR, Webster WR. 1974. Coding of spatial location by single units in the inferior colliculus of the alert cat. *Exp Brain Res* **21**:387–398. doi:[10.1007/BF00237901](https://doi.org/10.1007/BF00237901)
- Caggiano V, Leiras R, Goñi-Erro H, Masini D, Bellardita C, Bouvier J, Caldeira V, Fisone G, Kiehn O. 2018. Midbrain circuits that set locomotor speed and gait selection. *Nature* **553**:455–460. doi:[10.1038/nature25448](https://doi.org/10.1038/nature25448)
- Carcea I, Insanally MN, Froemke RC. 2017. Dynamics of auditory cortical activity during behavioural engagement and auditory perception. *Nat Commun* **8**:14412. doi:[10.1038/ncomms14412](https://doi.org/10.1038/ncomms14412)
- Chen C, Cheng M, Ito T, Song S. 2018. Neuronal Organization in the Inferior Colliculus Revisited with Cell-Type-Dependent Monosynaptic Tracing. *J Neurosci* **38**:3318–3332. doi:[10.1523/JNEUROSCI.2173-17.2018](https://doi.org/10.1523/JNEUROSCI.2173-17.2018)
- Clause A, Nguyen T, Kandler K. 2011. An acoustic startle-based method of assessing frequency discrimination in mice. *Journal of Neuroscience Methods* **200**:63–67. doi:[10.1016/j.jneumeth.2011.05.027](https://doi.org/10.1016/j.jneumeth.2011.05.027)
- Coleman JR, Clerici WJ. 1987. Sources of projections to subdivisions of the inferior colliculus in the rat. *J Comp Neurol* **262**:215–226. doi:[10.1002/cne.902620204](https://doi.org/10.1002/cne.902620204)

- Cooper MH, Young PA. 1976. Cortical projections to the inferior colliculus of the cat. *Experimental Neurology* **51**:488–502. doi:[10.1016/0014-4886\(76\)90272-7](https://doi.org/10.1016/0014-4886(76)90272-7)
- Creutzfeldt O, Ojemann G, Lettich E. 1989. Neuronal activity in the human lateral temporal lobe. *Exp Brain Res* **77**:476–489. doi:[10.1007/BF00249601](https://doi.org/10.1007/BF00249601)
- Dadarlat MC, Stryker MP. 2017. Locomotion Enhances Neural Encoding of Visual Stimuli in Mouse V1. *J Neurosci* **37**:3764–3775. doi:[10.1523/JNEUROSCI.2728-16.2017](https://doi.org/10.1523/JNEUROSCI.2728-16.2017)
- Doupe AJ. 1997. Song- and Order-Selective Neurons in the Songbird Anterior Forebrain and their Emergence during Vocal Development. *J Neurosci* **17**:1147–1167. doi:[10.1523/JNEUROSCI.17-03-01147.1997](https://doi.org/10.1523/JNEUROSCI.17-03-01147.1997)
- Egorova M, Ehret G, Vartanian I, Esser K-H. 2001. Frequency response areas of neurons in the mouse inferior colliculus. I. Threshold and tuning characteristics. *Exp Brain Res* **140**:145–161. doi:[10.1007/s002210100786](https://doi.org/10.1007/s002210100786)
- Ehret G. 1975. Frequency and intensity difference limens and nonlinearities in the ear of the housemouse (*Mus musculus*). *J Comp Physiol* **102**:321–336. doi:[10.1007/BF01464344](https://doi.org/10.1007/BF01464344)
- Eliades SJ, Wang X. 2013. Comparison of auditory-vocal interactions across multiple types of vocalizations in marmoset auditory cortex. *J Neurophysiol* **109**:1638–1657. doi:[10.1152/jn.00698.2012](https://doi.org/10.1152/jn.00698.2012)
- Escabí MA, Higgins NC, Galaburda AM, Rosen GD, Read HL. 2007. Early cortical damage in rat somatosensory cortex alters acoustic feature representation in primary auditory cortex. *Neuroscience* **150**:970–983. doi:[10.1016/j.neuroscience.2007.07.054](https://doi.org/10.1016/j.neuroscience.2007.07.054)
- Escabí MA, Schreiner CE. 2002. Nonlinear Spectrotemporal Sound Analysis by Neurons in the Auditory Midbrain. *J Neurosci* **22**:4114–4131. doi:[10.1523/JNEUROSCI.22-10-04114.2002](https://doi.org/10.1523/JNEUROSCI.22-10-04114.2002)
- Farley GR, Morley BJ, Javel E, Gorga MP. 1983. Single-unit responses to cholinergic agents in the rat inferior colliculus. *Hearing Research* **11**:73–91. doi:[10.1016/0378-5955\(83\)90046-1](https://doi.org/10.1016/0378-5955(83)90046-1)
- Goyer D, Silveira MA, George AP, Beebe NL, Edelbrock RM, Malinski PT, Schofield BR, Roberts MT. 2019. A novel class of inferior colliculus principal neurons labeled in vasoactive intestinal peptide-Cre mice. *eLife*. doi:[10.7554/eLife.43770](https://doi.org/10.7554/eLife.43770)
- Groh JM, Trause AS, Underhill AM, Clark KR, Inati S. 2001. Eye Position Influences Auditory Responses in Primate Inferior Colliculus. *Neuron* **29**:509–518. doi:[10.1016/S0896-6273\(01\)00222-7](https://doi.org/10.1016/S0896-6273(01)00222-7)
- Gruters KG, Groh JM. 2012. Sounds and beyond: multisensory and other non-auditory signals in the inferior colliculus. *Front Neural Circuits* **6**. doi:[10.3389/fncir.2012.00096](https://doi.org/10.3389/fncir.2012.00096)

- Guo W, Clause AR, Barth-Marion A, Polley DB. 2017. A Corticothalamic Circuit for Dynamic Switching between Feature Detection and Discrimination. *Neuron* **95**:180-194.e5. doi: [10.1016/j.neuron.2017.05.019](https://doi.org/10.1016/j.neuron.2017.05.019)
- Hormigo S, e Horta Junior J de A de C, Gómez-Nieto R, López García DE. 2012. The selective neurotoxin DSP-4 impairs the noradrenergic projections from the locus coeruleus to the inferior colliculus in rats. *Front Neural Circuits* **6**. doi:[10.3389/fncir.2012.00041](https://doi.org/10.3389/fncir.2012.00041)
- Hoz L de, Nelken I. 2014. Frequency Tuning in the Behaving Mouse: Different Bandwidths for Discrimination and Generalization. *PLOS ONE* **9**:e91676. doi:[10.1371/journal.pone.0091676](https://doi.org/10.1371/journal.pone.0091676)
- Huffman RF, Henson OW. 1990. The descending auditory pathway and acousticomotor systems: connections with the inferior colliculus. *Brain Res Brain Res Rev* **15**:295–323.
- Ito S, Feldheim DA, Litke AM. 2017. Segregation of Visual Response Properties in the Mouse Superior Colliculus and Their Modulation during Locomotion. *J Neurosci* **37**:8428–8443. doi:[10.1523/JNEUROSCI.3689-16.2017](https://doi.org/10.1523/JNEUROSCI.3689-16.2017)
- Ito T, Bishop DC, Oliver DL. 2009. Two Classes of GABAergic Neurons in the Inferior Colliculus. *J Neurosci* **29**:13860–13869. doi:[10.1523/JNEUROSCI.3454-09.2009](https://doi.org/10.1523/JNEUROSCI.3454-09.2009)
- Jain R, Shore S. 2006. External inferior colliculus integrates trigeminal and acoustic information: Unit responses to trigeminal nucleus and acoustic stimulation in the guinea pig. *Neuroscience Letters* **395**:71–75. doi:[10.1016/j.neulet.2005.10.077](https://doi.org/10.1016/j.neulet.2005.10.077)
- Jen PH-S, Sun X, Chen QC. 2001. An electrophysiological study of neural pathways for corticofugally inhibited neurons in the central nucleus of the inferior colliculus of the big brown bat, *Eptesicus fuscus*. *Experimental Brain Research* **137**:292–302. doi:[10.1007/s002210000637](https://doi.org/10.1007/s002210000637)
- Kanold PO, Young ED. 2001. Proprioceptive Information from the Pinna Provides Somatosensory Input to Cat Dorsal Cochlear Nucleus. *J Neurosci* **21**:7848–7858. doi: [10.1523/JNEUROSCI.21-19-07848.2001](https://doi.org/10.1523/JNEUROSCI.21-19-07848.2001)
- Klepper A, Herbert H. 1991. Distribution and origin of noradrenergic and serotonergic fibers in the cochlear nucleus and inferior colliculus of the rat. *Brain Research* **557**:190–201. doi:[10.1016/0006-8993\(91\)90134-H](https://doi.org/10.1016/0006-8993(91)90134-H)
- Künzle H. 1998. Origin and terminal distribution of the trigeminal projections to the inferior and superior colliculi in the lesser hedgehog tenrec. *European Journal of Neuroscience* **10**:368–376. doi:[10.1046/j.1460-9568.1998.00020.x](https://doi.org/10.1046/j.1460-9568.1998.00020.x)
- Lee AM, Hoy JL, Bonci A, Wilbrecht L, Stryker MP, Niell CM. 2014. Identification of a Brainstem Circuit Regulating Visual Cortical State in Parallel with Locomotion. *Neuron* **83**:455–466. doi:[10.1016/j.neuron.2014.06.031](https://doi.org/10.1016/j.neuron.2014.06.031)

- Lesica NA, Grothe B. 2008. Dynamic Spectrotemporal Feature Selectivity in the Auditory Midbrain. *J Neurosci* **28**:5412–5421. doi:[10.1523/JNEUROSCI.0073-08.2008](https://doi.org/10.1523/JNEUROSCI.0073-08.2008)
- Lesica NA, Lingner A, Grothe B. 2010. Population Coding of Interaural Time Differences in Gerbils and Barn Owls. *J Neurosci* **30**:11696–11702. doi:[10.1523/JNEUROSCI.0846-10.2010](https://doi.org/10.1523/JNEUROSCI.0846-10.2010)
- Lesicko AMH, Hristova TS, Maigler KC, Llano DA. 2016. Connectional Modularity of Top-Down and Bottom-Up Multimodal Inputs to the Lateral Cortex of the Mouse Inferior Colliculus. *J Neurosci* **36**:11037–11050. doi:[10.1523/JNEUROSCI.4134-15.2016](https://doi.org/10.1523/JNEUROSCI.4134-15.2016)
- Li H, Mizuno N. 1997. Single neurons in the spinal trigeminal and dorsal column nuclei project to both the cochlear nucleus and the inferior colliculus by way of axon collaterals: a fluorescent retrograde double-labeling study in the rat. *Neurosci Res* **29**:135–142. doi:[10.1016/s0168-0102\(97\)00082-5](https://doi.org/10.1016/s0168-0102(97)00082-5)
- Malmierca MS. 2004. The Inferior Colliculus: A Center for Convergence of Ascending and Descending Auditory Information. *NBA* **3**:215–229. doi:[10.1159/000096799](https://doi.org/10.1159/000096799)
- McGinley MJ, David SV, McCormick DA. 2015. Cortical Membrane Potential Signature of Optimal States for Sensory Signal Detection. *Neuron* **87**:179–192. doi:[10.1016/j.neuron.2015.05.038](https://doi.org/10.1016/j.neuron.2015.05.038)
- Mineault PJ, Tring E, Trachtenberg JT, Ringach DL. 2016. Enhanced Spatial Resolution During Locomotion and Heightened Attention in Mouse Primary Visual Cortex. *J Neurosci* **36**:6382–6392. doi:[10.1523/JNEUROSCI.0430-16.2016](https://doi.org/10.1523/JNEUROSCI.0430-16.2016)
- Morest DK, Oliver DL. 1984. The neuronal architecture of the inferior colliculus in the cat: defining the functional anatomy of the auditory midbrain. *J Comp Neurol* **222**:209–236. doi:[10.1002/cne.902220206](https://doi.org/10.1002/cne.902220206)
- Motts SD, Schofield BR. 2009. Sources of cholinergic input to the inferior colliculus. *Neuroscience* **160**:103–114. doi:[10.1016/j.neuroscience.2009.02.036](https://doi.org/10.1016/j.neuroscience.2009.02.036)
- Nelson A, Mooney R. 2016. The Basal Forebrain and Motor Cortex Provide Convergent yet Distinct Movement-Related Inputs to the Auditory Cortex. *Neuron* **90**:635–648. doi:[10.1016/j.neuron.2016.03.031](https://doi.org/10.1016/j.neuron.2016.03.031)
- Nelson A, Schneider DM, Takato J, Sakurai K, Wang F, Mooney R. 2013. A Circuit for Motor Cortical Modulation of Auditory Cortical Activity. *J Neurosci* **33**:14342–14353. doi:[10.1523/JNEUROSCI.2275-13.2013](https://doi.org/10.1523/JNEUROSCI.2275-13.2013)
- Niell CM, Stryker MP. 2010. Modulation of visual responses by behavioral state in mouse visual cortex. *Neuron* **65**:472–479. doi:[10.1016/j.neuron.2010.01.033](https://doi.org/10.1016/j.neuron.2010.01.033)
- Oertel D, Young ED. 2004. What's a cerebellar circuit doing in the auditory system? *Trends in Neurosciences* **27**:104–110. doi:[10.1016/j.tins.2003.12.001](https://doi.org/10.1016/j.tins.2003.12.001)

- Olthof BM, Rees A, Gartside SE. 2019. Multiple non-auditory cortical regions innervate the auditory midbrain. *J Neurosci* 1436–19. doi:[10.1523/JNEUROSCI.1436-19.2019](https://doi.org/10.1523/JNEUROSCI.1436-19.2019)
- Ono M, Bishop DC, Oliver DL. 2017. Identified GABAergic and Glutamatergic Neurons in the Mouse Inferior Colliculus Share Similar Response Properties. *J Neurosci* 37:8952–8964. doi:[10.1523/JNEUROSCI.0745-17.2017](https://doi.org/10.1523/JNEUROSCI.0745-17.2017)
- Ono M, Oliver DL. 2014. The Balance of Excitatory and Inhibitory Synaptic Inputs for Coding Sound Location. *J Neurosci* 34:3779–3792. doi:[10.1523/JNEUROSCI.2954-13.2014](https://doi.org/10.1523/JNEUROSCI.2954-13.2014)
- Porter KK, Metzger RR, Groh JM. 2007. Visual- and saccade-related signals in the primate inferior colliculus. *PNAS* 104:17855–17860. doi:[10.1073/pnas.0706249104](https://doi.org/10.1073/pnas.0706249104)
- Porter KK, Metzger RR, Groh JM. 2006. Representation of Eye Position in Primate Inferior Colliculus. *Journal of Neurophysiology* 95:1826–1842. doi:[10.1152/jn.00857.2005](https://doi.org/10.1152/jn.00857.2005)
- Poulet JFA, Hedwig B. 2002. A corollary discharge maintains auditory sensitivity during sound production. *Nature* 418:872. doi:[10.1038/nature00919](https://doi.org/10.1038/nature00919)
- Reimer J, McGinley MJ, Liu Y, Rodenkirch C, Wang Q, McCormick DA, Tlomas AS. 2016. Pupil fluctuations track rapid changes in adrenergic and cholinergic activity in cortex. *Nature Communications* 7:13289. doi:[10.1038/ncomms13289](https://doi.org/10.1038/ncomms13289)
- Robards MJ. 1979. Somatic neurons in the brainstem and neocortex projecting to the external nucleus of the inferior colliculus: an anatomical study in the opossum. *J Comp Neurol* 184:547–565. doi:[10.1002/cne.901840308](https://doi.org/10.1002/cne.901840308)
- Rockel AJ, Jones EG. 1973. The neuronal organization of the inferior colliculus of the adult cat. II. The pericentral nucleus. *J Comp Neurol* 149:301–334. doi:[10.1002/cne.901490303](https://doi.org/10.1002/cne.901490303)
- Rummell BP, Klee JL, Sigurdsson T. 2016. Attenuation of Responses to Self-Generated Sounds in Auditory Cortical Neurons. *J Neurosci* 36:12010–12026. doi:[10.1523/JNEUROSCI.1564-16.2016](https://doi.org/10.1523/JNEUROSCI.1564-16.2016)
- Schneider DM, Mooney R. 2018. How Movement Modulates Hearing. *Annual Review of Neuroscience* 41:553–572. doi:[10.1146/annurev-neuro-072116-031215](https://doi.org/10.1146/annurev-neuro-072116-031215)
- Schneider DM, Nelson A, Mooney R. 2014. A synaptic and circuit basis for corollary discharge in the auditory cortex. *Nature* 513:189–194. doi:[10.1038/nature13724](https://doi.org/10.1038/nature13724)
- Schneider DM, Sundararajan J, Mooney R. 2018. A cortical filter that learns to suppress the acoustic consequences of movement. *Nature* 561:391–395. doi:[10.1038/s41586-018-0520-5](https://doi.org/10.1038/s41586-018-0520-5)
- Schnupp JW, King AJ. 1997. Coding for auditory space in the nucleus of the brachium of the inferior colliculus in the ferret. *J Neurophysiol* 78:2717–2731. doi:[10.1152/jn.1997.78.5.2717](https://doi.org/10.1152/jn.1997.78.5.2717)

- Schuller G. 1979. Vocalization influences auditory processing in collicular neurons of the CF-FM-bat, *Rhinolophus ferrumequinum*. *J Comp Physiol* **132**:39–46. doi:[10.1007/BF00617730](https://doi.org/10.1007/BF00617730)
- Shore SE. 2005. Multisensory integration in the dorsal cochlear nucleus: unit responses to acoustic and trigeminal ganglion stimulation. *European Journal of Neuroscience* **21**:3334–3348. doi:[10.1111/j.1460-9568.2005.04142.x](https://doi.org/10.1111/j.1460-9568.2005.04142.x)
- Singla S, Dempsey C, Warren R, Enikolopov AG, Sawtell NB. 2017. A cerebellum-like circuit in the auditory system cancels responses to self-generated sounds. *Nat Neurosci* **20**:943–950. doi:[10.1038/nn.4567](https://doi.org/10.1038/nn.4567)
- Suga N, Schlegel P. 1972. Neural attenuation of responses to emitted sounds in echolocating rats. *Science* **177**:82–84. doi:[10.1126/science.177.4043.82](https://doi.org/10.1126/science.177.4043.82)
- Tammer R, Ehrenreich L, Jürgens U. 2004. Telemetrically recorded neuronal activity in the inferior colliculus and bordering tegmentum during vocal communication in squirrel monkeys (*Saimiri sciureus*). *Behavioural Brain Research* **151**:331–336. doi:[10.1016/j.bbr.2003.09.008](https://doi.org/10.1016/j.bbr.2003.09.008)
- Winer JA, Schreiner CE. 2005. *The Inferior Colliculus*. New York, Springer.
- Williamson RS, Hancock KE, Shinn-Cunningham BG, Polley DB. 2015. Locomotion and Task Demands Differentially Modulate Thalamic Audiovisual Processing during Active Search. *Current Biology* **25**:1885–1891. doi:[10.1016/j.cub.2015.05.045](https://doi.org/10.1016/j.cub.2015.05.045)
- Woolley SMN, Portfors CV. 2013. Conserved mechanisms of vocalization coding in mammalian and songbird auditory midbrain. *Hear Res* **305**:45–56. doi:[10.1016/j.heares.2013.05.005](https://doi.org/10.1016/j.heares.2013.05.005)
- Xiong XR, Liang F, Li H, Mesik L, Zhang KK, Polley DB, Tao HW, Xiao Z, Zhang LI. 2013. Interaural Level Difference-Dependent Gain Control and Synaptic Scaling Underlying Binaural Computation. *Neuron* **79**:738–753. doi:[10.1016/j.neuron.2013.06.012](https://doi.org/10.1016/j.neuron.2013.06.012)
- Xiong XR, Liang F, Zingg B, Ji X, Ibrahim LA, Tao HW, Zhang LI. 2015. Auditory cortex controls sound-driven innate defense behaviour through corticofugal projections to inferior colliculus. *Nat Commun* **6**:7224. doi:[10.1038/ncomms8224](https://doi.org/10.1038/ncomms8224)
- Zhou J, Shore S. 2006. Convergence of spinal trigeminal and cochlear nucleus projections in the inferior colliculus of the guinea pig. *Journal of Comparative Neurology* **495**:100–112. doi:[10.1002/cne.20863](https://doi.org/10.1002/cne.20863)
- Zhou M, Liang F, Xiong XR, Li L, Li H, Xiao Z, Tao HW, Zhang LI. 2014. Scaling down of balanced excitation and inhibition by active behavioral states in auditory cortex. *Nature Neuroscience* **17**:841–850. doi:[10.1038/nn.3701](https://doi.org/10.1038/nn.3701)
